# Supplementary material
Source: MDPI journal article supplement (https://www.mdpi.com/2071-1050/12/13/5326)
Supplement: s1 [file s1]

**Supplementary material 1.** Checklist of information collected during swidden farmer survey

Location: \_\_\_\_\_

Date: \_\_\_\_/\_\_\_\_/\_\_\_\_

**1. Demographic and socio-economic detail**

ID/Name of the respondent: \_\_\_\_\_ Ethnicity: \_\_\_\_\_

Gender: M / F Age: \_\_\_\_\_ Education: Illiterate/ Primary / Secondary / Graduate

Gender of household head: M / F \_\_\_\_\_

HH members: \_\_\_\_ Male Adults \_\_\_\_ Female Adults \_\_\_\_ Male children \_\_\_\_ Female children

Occupation: Primary \_\_\_\_\_ Secondary \_\_\_\_\_ Other(s) \_\_\_\_\_

Housing condition: \_\_\_\_\_ Livestock resources: \_\_\_\_ Cattle \_\_\_\_ Goat \_\_\_\_ Pigs

Memberships of institutions (e.g. CFUG member): \_\_\_\_\_

Distance from nearby forest: \_\_\_\_\_ from Swidden field (if any) \_\_\_\_\_

**2. Land-use information**

Land-use practices: \_\_\_\_\_

Total land area: \_\_\_\_\_ Major crops: \_\_\_\_\_

Area by major land-use:

| Land-use                  | Agriculture | Swiddencultivation |  |  |  |
|---------------------------|-------------|--------------------|--|--|--|
| Area (now)                |             |                    |  |  |  |
| Area<br>(10 year before)  |             |                    |  |  |  |
| Land-<br>characteristics* |             |                    |  |  |  |
| Tenure**                  |             |                    |  |  |  |

\*Land-characteristics: Slope/ Fertility / Other (specify)

\*\*Tenure: Self owned / Leased / Other (specify)

### 3. Cultural management practices in swidden cultivation system

No. of family members involved in shifting cultivation: \_\_\_\_ Male \_\_\_\_ Female \_\_\_\_ Infant

Year involved in swidden cultivation: \_\_\_\_\_

Major crops: \_\_\_\_\_

Seasonal activity:

| Month      | Jan | Feb. | Mar. | Apr. | May | Jun. | Jul. | Aug. | Sep. | Oct. | Nov. | Dec. |
|------------|-----|------|------|------|-----|------|------|------|------|------|------|------|
| Activity 1 |     |      |      |      |     |      |      |      |      |      |      |      |
| Activity 2 |     |      |      |      |     |      |      |      |      |      |      |      |
| Activity 3 |     |      |      |      |     |      |      |      |      |      |      |      |
| Activity 4 |     |      |      |      |     |      |      |      |      |      |      |      |
| Activity 5 |     |      |      |      |     |      |      |      |      |      |      |      |

What is (was) the major criteria for selecting land for swidden cultivation? \_\_\_\_\_

\_\_\_\_\_

Is there any change happening in the shifting cultivation practice: Y / N

If yes, what changes? \_\_\_\_\_

Since when? \_\_\_\_\_

What is (are) the reason (s) behind? \_\_\_\_\_

### 4. Farmers' perceptions

Why you are practicing swidden cultivation? \_\_\_\_\_

Is there any change in extents of lands under swidden cultivation? Y/N \_\_\_\_\_

If Y, since when and why? \_\_\_\_\_

What are the advantage/benefits and of swidden cultivation over other land use (s)?

| Land-use | Advantages |
|----------|------------|
|          |            |

|                       |  |
|-----------------------|--|
| Shifting cultivation  |  |
| Permanent agriculture |  |
| Grazing               |  |
|                       |  |

What are the disadvantages of swidden cultivation over other land uses?

| Land-use             | Disadvantages |
|----------------------|---------------|
| Shifting cultivation |               |
|                      |               |
|                      |               |
|                      |               |

Do you think shifting cultivation system is favoring biodiversity conservation? Y/N\_\_\_\_\_

If Y, which group/taxa of plants/animals?\_\_\_\_\_

What are the different ecosystem services provided by swidden cultivation?\_\_\_\_\_

\_\_\_\_\_

\_\_\_\_\_

What are the ecosystems properties you think are mostly affected by swidden cultivation? \_\_\_\_\_

\_\_\_\_\_

Clarify the reason (why/how?) \_\_\_\_\_

Which factors are negatively affecting swidden cultivation in the area?

\_\_\_\_\_

\_\_\_\_\_

Do you want to continue shifting cultivation practice in near future? Y/N

Which type of support do you ask from govt./authority for that?\_\_\_\_\_

\_\_\_\_\_

**Additional notes:**

\_\_\_\_\_
